# Supplementary material for: Sevoflurane Dampens Acute Pulmonary Inflammation via the Adenosine Receptor A2B and Heme Oxygenase-1
Source: MDPI journal article supplement (doi:10.3390/cells11071094), 2022-03-24
Supplement: s1 [file s1]

**A**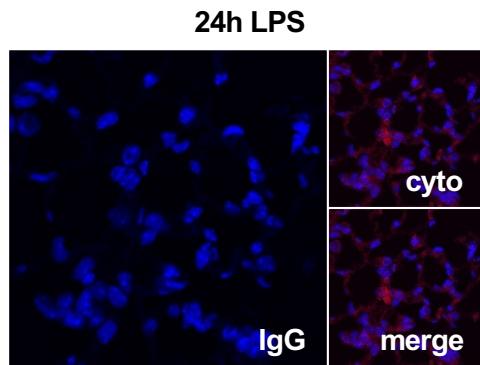**B**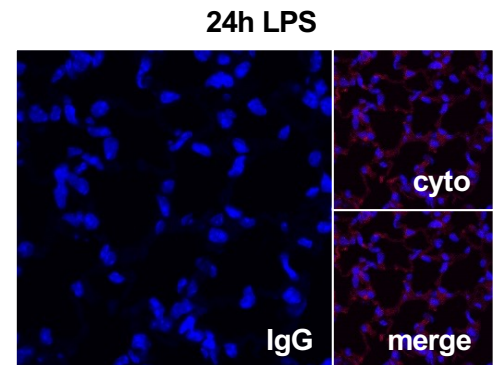**C**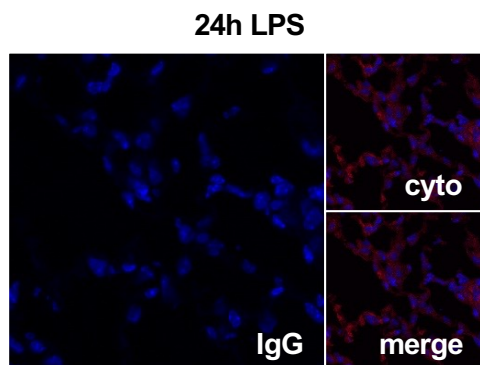**D**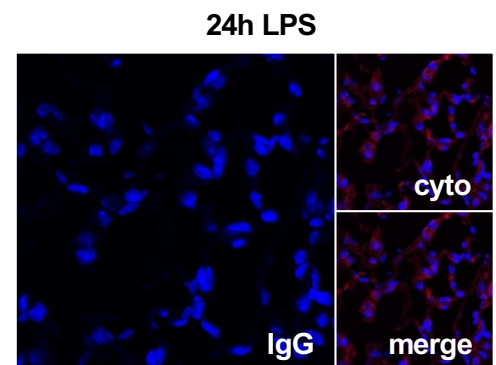

**Supplementary Figure S1.** (A) IgG control of zonula occludin-1 (ZO-1) and (B) occludin were performed by immunohistochemical staining from the lung tissue of wild-type animals (original magnification 63x; one representative image of four is shown; n=4). (C) Immunofluorescence experiments with unspecific IgG antibodies served as control staining for the detection heme oxygenase-1 (HO-1) and (D) adenosine A2B receptor (Adora2b) on the lung (original magnification 63x; one representative image of four is shown; n=4). DAPI was used as nuclear marker.

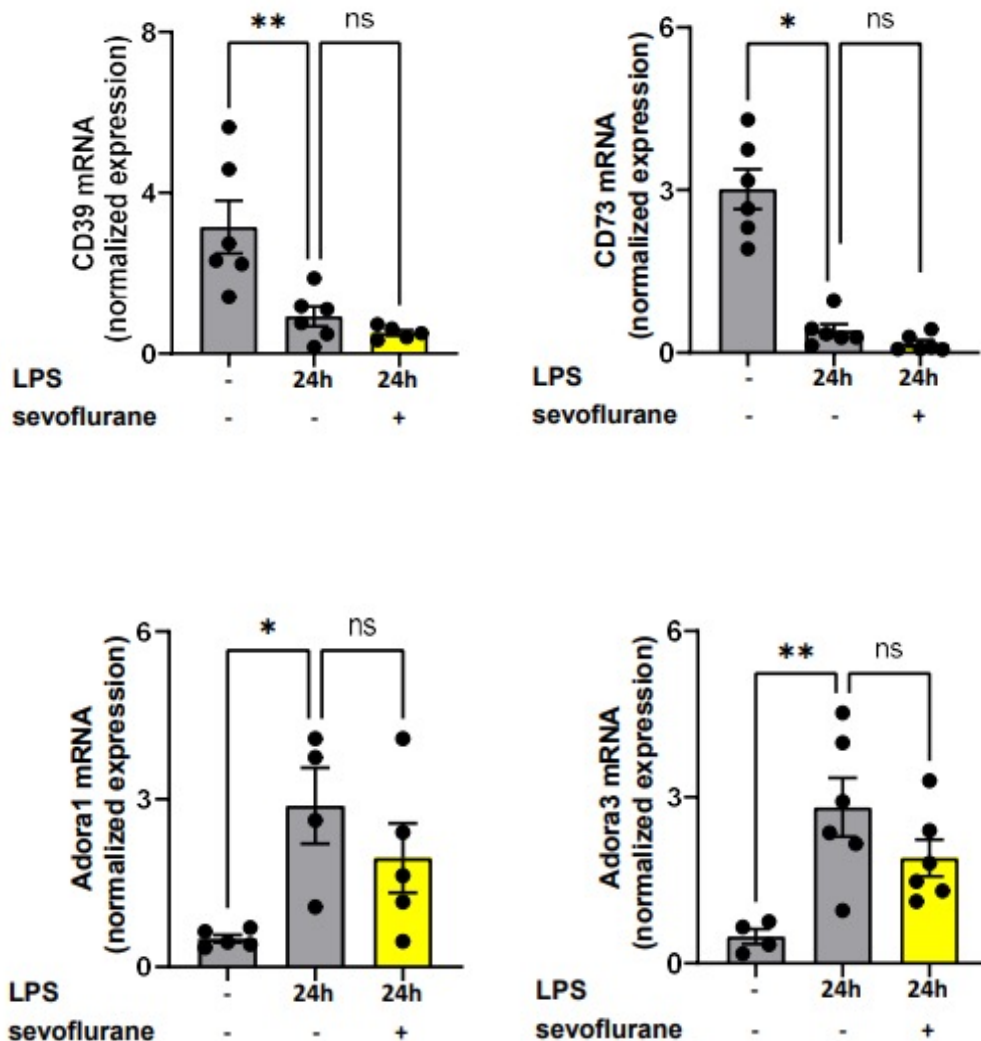

**Supplementary Figure S2. Effects of sevoflurane on CD39, CD73, adenosine receptor A1 (Adora1), and Adora3 during acute pulmonary inflammation.** CD39, CD73, Adora1, and Adora3 gene expression were evaluated in the pulmonary tissue 24 hours after lipopolysaccharide (LPS) stimulation by RT-PCR (n=4-6). Multiple group comparison was analyzed by one-way ANOVA and Bonferroni correction or Kruskal-Wallis test. Data are presented as mean  $\pm$  SEM; ns = not significant; \* P<0.05; \*\* P<0.01.

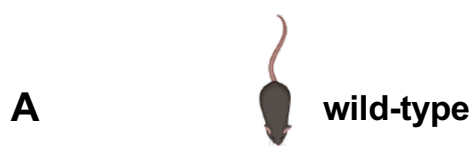

without LPS

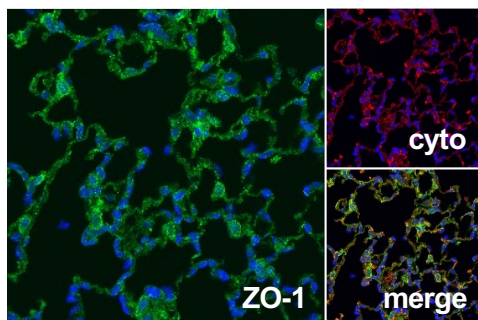

24h LPS

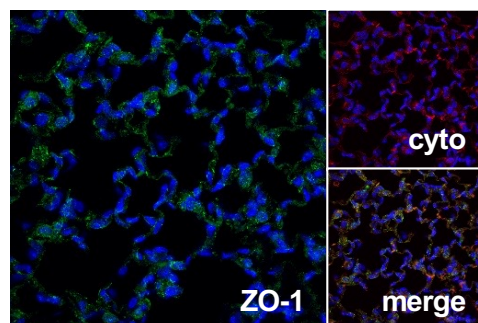

24h LPS +  
sevoflurane

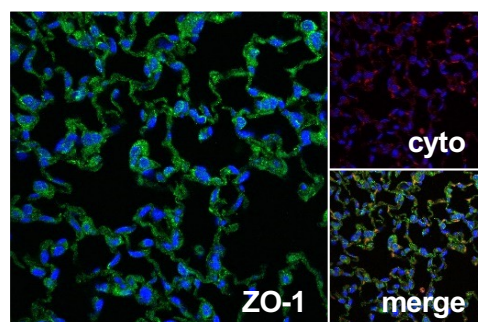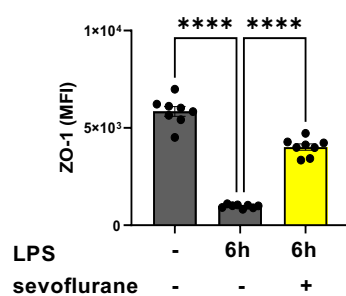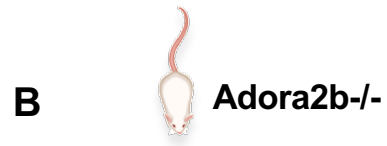

without LPS

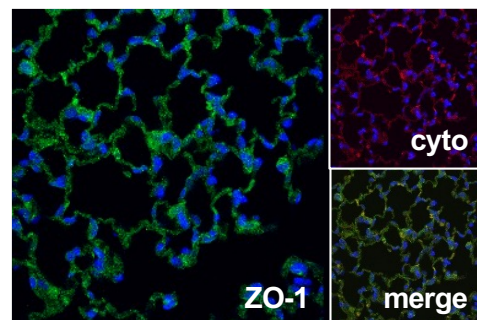

24h LPS

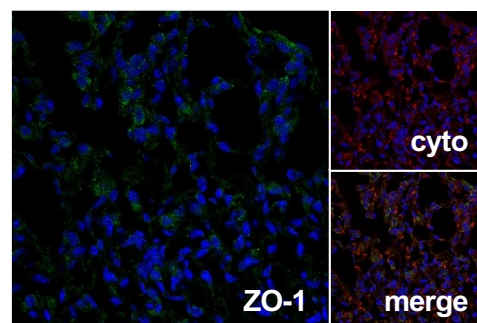

24h LPS +  
sevoflurane

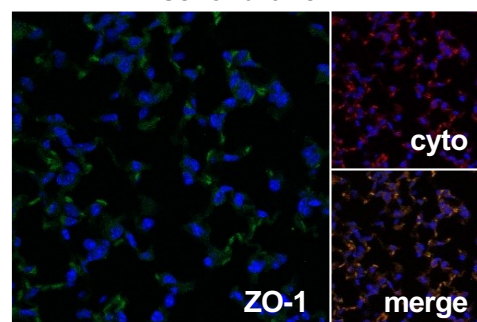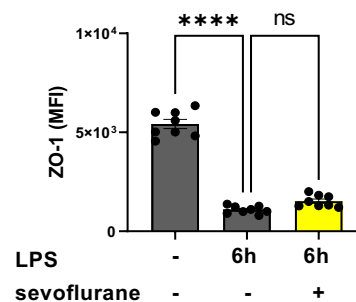

**Supplementary Figure S3.** (A) The lipopolysaccharide (LPS)-related expression of the tight junction protein zonula occludin-1 (ZO-1; green), in the lung tissue (red; cyto; cytokeratin) of wild-type and (B) adenosine receptor A2B (Adora2b) <sup>-/-</sup> mice were determined by immunofluorescence (original magnification x63; one representative image of three independent experiments is shown; n=3). DAPI (blue) was used as nuclear marker. Mean fluorescence intensities (MFI) of ZO-1 with or without LPS exposure were measured by using ImageJ (n=6-8). Statistical analyses were performed by one-way ANOVA + Bonferroni correction. Data are presented as mean ± SEM; ns = not significant; \*\*\*\* P<0.0001.



**A**

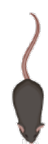

wild-type

without LPS

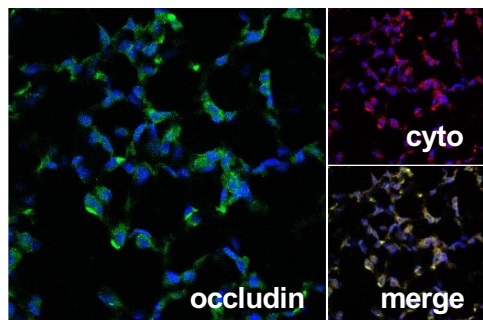

24h LPS

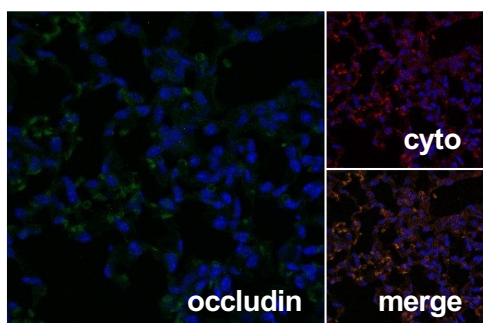

24h LPS +  
sevoflurane

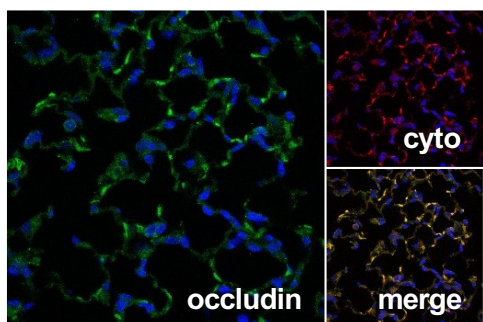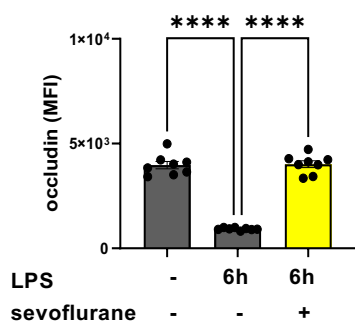

**B**

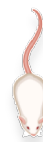

Adora2b<sup>-/-</sup>

without LPS

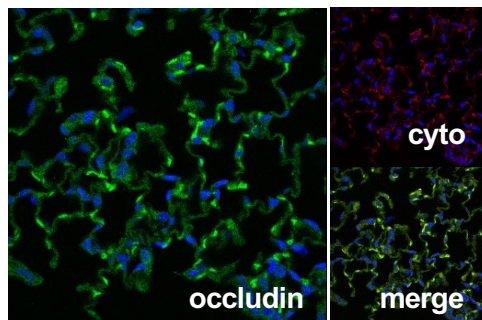

24h LPS

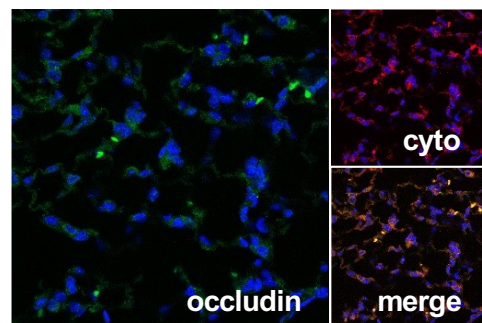

24h LPS +  
sevoflurane

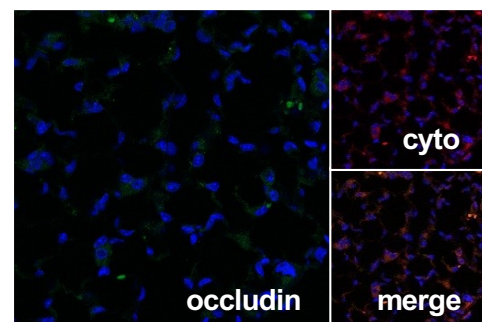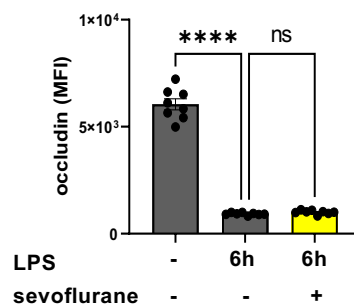

**Supplementary Figure S4.** (A) The lipopolysaccharide (LPS)-induced occludin (green) expression, in the lung tissue of wild-type and (B) adenosine receptor A2B (Adora2b) <sup>-/-</sup> mice were determined in the lung tissue (red; cyto; cytokeratin) by immunofluorescence (original magnification x63; one representative image of three independent experiments is shown; n=3). DAPI (blue) was used as nuclear marker. Mean fluorescence intensities (MFI) of occludin were measured at indicated conditions by using ImageJ (n=6-8). Statistical analyses were performed by one-way ANOVA + Bonferroni correction. Data are presented as mean  $\pm$  SEM; ns = not significant; \*\*\*\* P<0.0001.

**A**

without LPS

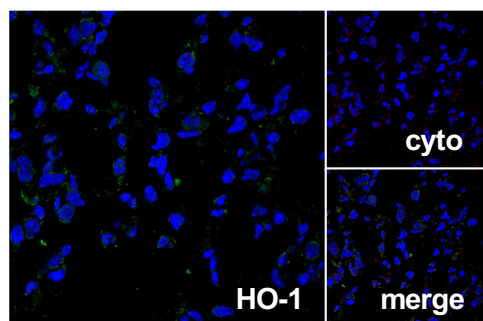

24h LPS

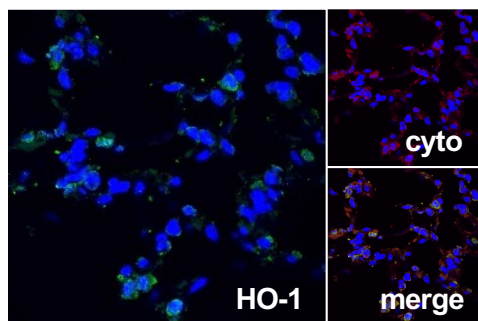

24h LPS + hemin

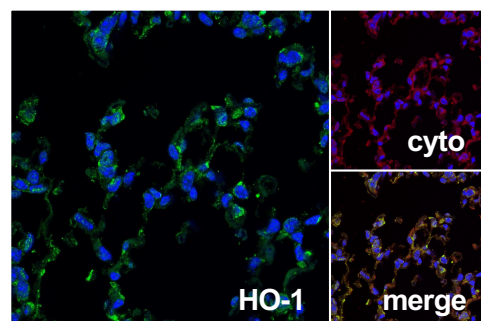

24h LPS  
+ sevoflurane

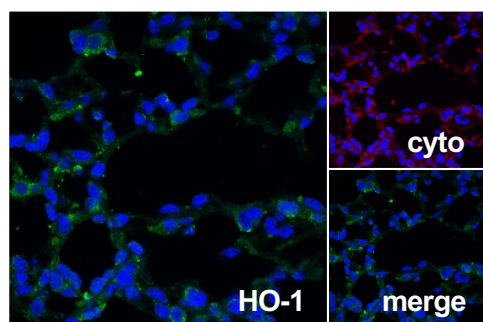

24h LPS  
+ hemin + sevoflurane

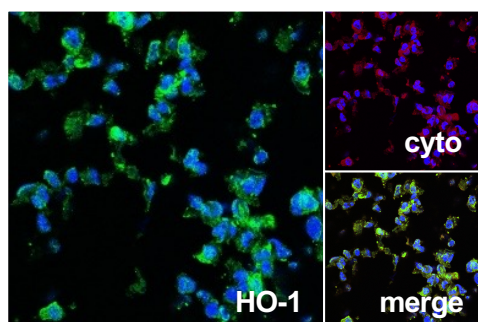

**B**

without LPS

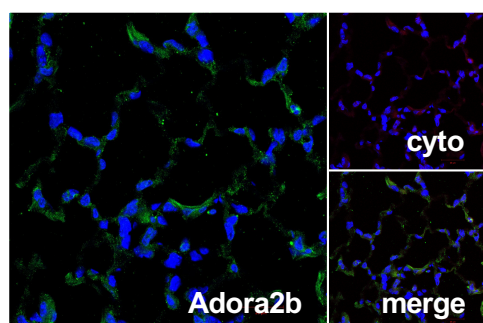

24h LPS

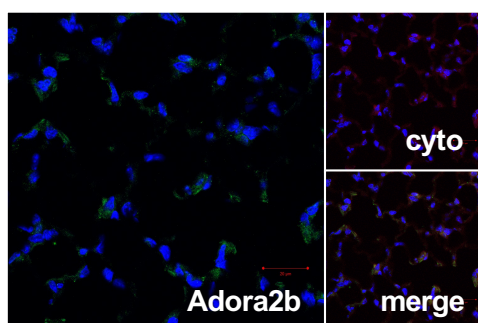

24h LPS + hemin

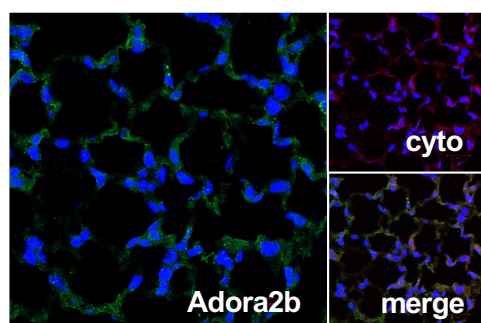

24h LPS  
+ sevoflurane

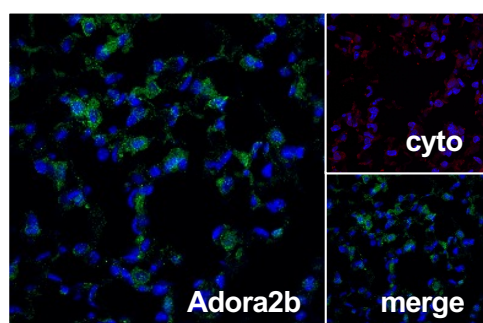

24h LPS  
+ hemin + sevoflurane

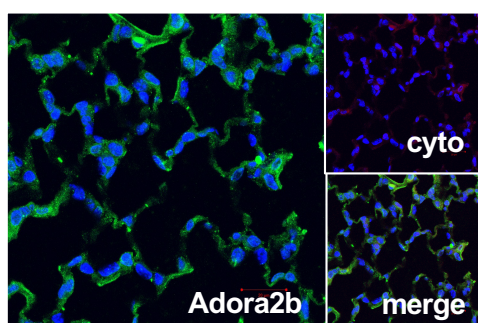

**Supplementary Figure S5.** (A) Heme oxygenase-1 (HO-1) expression (green) in the pulmonary tissue (red; cyto; cytokeratin) was evaluated 24 hours after lipopolysaccharide (LPS) exposure by immunofluorescence at indicated conditions. (original magnification x63; one representative image of three independent experiments is shown; n=3). (B) Immunofluorescence staining of adenosine receptor A2B (Adora2b) surface expression (green) in lung tissue (red; cyto; cytokeratin) of wild-type animals were evaluated at indicated conditions (original magnification x63; one representative image of three independent experiments is shown; n=3). DAPI (blue) served as nuclear marker.
